# Supplementary material
Source: publisher figshare collection journal article supplement (https://acs.figshare.com/ndownloader/files/17832785)
Supplement: Supplementary file 1 [file 17832785]

## Supporting Information

### Electrocatalytic CO<sub>2</sub> Reduction to Alcohols with High Selectivity over Two-Dimensional Fe<sub>2</sub>P<sub>2</sub>S<sub>6</sub> Nanosheet

Lei Ji,<sup>†,§,#</sup> Le Chang,<sup>†,#</sup> Ya Zhang,<sup>†,§</sup> Shiyong Mou,<sup>†</sup> Ting Wang,<sup>⊥,†</sup> Yonglan Luo,<sup>\*,⊥</sup> Zhiming Wang,<sup>†</sup> and Xuping Sun<sup>\*,†</sup>

<sup>†</sup>Institute of Fundamental and Frontier Sciences, University of Electronic Science and Technology of China, Chengdu 610054, Sichuan, China, <sup>§</sup>College of Chemistry, Sichuan University, Chengdu 610064, Sichuan, China, and <sup>⊥</sup>Chemical Synthesis and Pollution Control Key Laboratory of Sichuan Province, College of Chemistry and Chemical Engineering, China West Normal University, Nanchong 637002, Sichuan, China

<sup>#</sup>L.J. and L.C. contributed equally to this work

\*E-mail: luoylcwnu@hotmail.com (Y.L.); xpsun@uestc.edu.cn (X.S.)

## Experimental Section

**Materials:** Elemental iron (Fe, 99.99%, Sigma Aldrich, USA), red phosphorus powder (P, 100 mesh, 99%, Alfa Aesar, USA), potassium bicarbonate ( $\text{KHCO}_3$ ), and sulfur (S, 99.98%, Aldrich, USA) were purchased. Analytical grade acetone was purchased from Fisher Scientific and it was distilled and used for the exfoliation of layered  $\text{Fe}_2\text{P}_2\text{S}_6$ . The sealing system (PPS-90, MRVS-1002) was purchased from Partulab Technology Co. Ltd. The water use throughout all experiments was purified through a Millipore system.

**Preparation of bulk  $\text{Fe}_2\text{P}_2\text{S}_6$  and  $\text{Fe}_2\text{P}_2\text{S}_6$  nanosheet:** Bulk  $\text{Fe}_2\text{P}_2\text{S}_6$  was obtained by heating the mixture (about 0.5 g in total) of elements (Fe, P and S with 99.99% purity) in the required stoichiometric ratio in evacuated ( $\sim 10^{-4}$  Pa) quartz tube at 700 °C at a ramping rate of 1 °C  $\text{min}^{-1}$  and held at this temperature for 6 days.  $\text{Fe}_2\text{P}_2\text{S}_6$  nanosheets were prepared by exfoliation of bulk crystals. Briefly, 30 mg of the bulk crystals were dispersed in 10 mL of distilled acetone and sonicated for 4 h by ultrasonic cell disruptor. The moderately stable colloidal dispersions were centrifuged at 3000 rpm for 15 mins to remove bulky, unexfoliated material. Very stable, clear supernatant containing large quantities of  $\text{Fe}_2\text{P}_2\text{S}_6$  nanosheets was obtained. Next, 500  $\mu\text{L}$  of the obtained solution was added into 480  $\mu\text{L}$   $\text{H}_2\text{O}$  containing 20  $\mu\text{L}$  of 5 wt% Nafion and sonicated for 1 h by normal ultrasonic instrument. Then 20  $\mu\text{L}$  catalyst ink was loaded on a  $1 \times 1 \text{ cm}^2$  carbon paper and dried under ambient condition, the catalyst loading mass is 0.1 mg.

**Characterizations:** XRD data were obtained from a LabX XRD-6100 X-ray diffractometer with Cu  $\text{K}\alpha$  radiation (40 kV, 30 mA) of wavelength 0.154 nm (SHIMADZU, Japan). XPS measurements were performed on an ESCALABMK II X-ray photoelectron spectrometer using Mg as the exciting source. SEM images were collected from the tungsten lamp-equipped SU3500 scanning electron microscope at an accelerating voltage of 20 kV (HITACHI, Japan). TEM images were obtained from a Zeiss Libra 200FE transmission electron microscope operated at 200 kV.  $^1\text{H}$  NMR spectra were collected on NMR spectrometer (Bruker AVANCEAV III HD 500) and

dimethyl sulphoxide was used as an internal to calibrate the chemical shifts in the spectra. Pre-saturation method was used to suppress water peak.

**Electrochemical measurements:** All electrochemical measurements were conducted using a CHI660E potentiostat (CH Instruments, China) in an H-type electrochemical cell separated by a Nafion 117 membrane, where graphite rod as the counter electrode and Ag/AgCl as the reference electrode. A mass flow controller was used to set the CO<sub>2</sub> flow rate at 30 sccm. All potentials measured were calibrated to RHE using the following equation:  $E(\text{RHE}) = E(\text{Ag/AgCl}) + 0.61 \text{ V}$ . All electrolytes were saturated by Ar or CO<sub>2</sub> bubbles before and during the experiments. Polarization curves were obtained using LSV with a scan rate of 2 mV s<sup>-1</sup>. The long-term durability test was performed using chronopotentiometric measurements.

**GC analysis:** Detection and quantification of possible products was performed on an SHIMADZU GC-2014C gas chromatograph system equipped with two flame ionization detectors, one thermal conductivity detector and headspace auto-sampling sampler (COLINTech AutoHS). Separation was achieved using a DB-WAX column (100% polyethylene glycol, 30 m long with a 0.53 mm i.d. and 1.0 μm film thickness) and aluminium oxide column.

**Ion chromatography:** Detection and quantification of possible products (HCOO<sup>-</sup>) was performed on a Metrohm 940 professional ion chromatograph system.

**Calculations of FE for H<sub>2</sub>, methanol, and ethanol:** FE was determined using the following equation:

$$\text{FE} = \frac{\text{Amount of electrons required to form the products}}{\text{Total amount of electrons supplied to system}} \times 100\%$$

**Density functional theory calculations (DFT) calculation details:** DFT calculations were performed with the spin-polarized planewave method implemented in the Quantum Espresso packag.<sup>1</sup> The Perdew–Burke–Ernzerhof (PBE) functional based on the generalized gradient approximation (GGA) were employed to evaluate the non-local exchange-correlation (xc) energy.<sup>2</sup> In a cubic supercell, the values of 40 and 400 Ry were used as the kinetic energy cutoff for wave functions and charge densities. The current work employs the Fe<sub>2</sub>P<sub>2</sub>S<sub>6</sub> surface. The possible positions of the atoms in

the complex were fully optimized until the forces were smaller than 0.01 eV Å<sup>-1</sup> per atom. The first Brillouin zone was sampled at the G point, and the electronic levels were broadened with a Gaussian smearing of about 0.002 Ry.<sup>3</sup> The self-consistent field calculation has convergence criteria of 10<sup>-6</sup> Hartree. The spin-polarization calculation was considered throughout the DFT calculation. A computational hydrogen electrode (CHE) was used to establish a free energy profile for electrochemical reduction reactions, as pioneered by Nørskov and co-workers.<sup>4</sup> Briefly, to convert electronic energies to free energies, zero-point energy, enthalpy and entropy corrections of adsorbates were calculated using a harmonic oscillator approximation at 298.15 K. In details, Gibbs free energy is defined:

$$\Delta G = \Delta E + \Delta E_{\text{ZPE}} - T\Delta S$$

where  $\Delta E$  represents the variation of the reaction energy obtained from DFT calculations as the expression:  $\Delta E = E_{\text{AB}} - E_{\text{A}} - E_{\text{B}}$ , where  $\Delta E_{\text{ZPE}}$  is zero-point energy (ZPE) difference between the products and reactants in the reaction whose expression is similar to  $\Delta E$ , where  $T$  represents the temperature ( $T = 298.15$  K), and  $\Delta S$  represents the change of entropy. For molecules, free energy corrections are taken from the reference.<sup>5</sup>

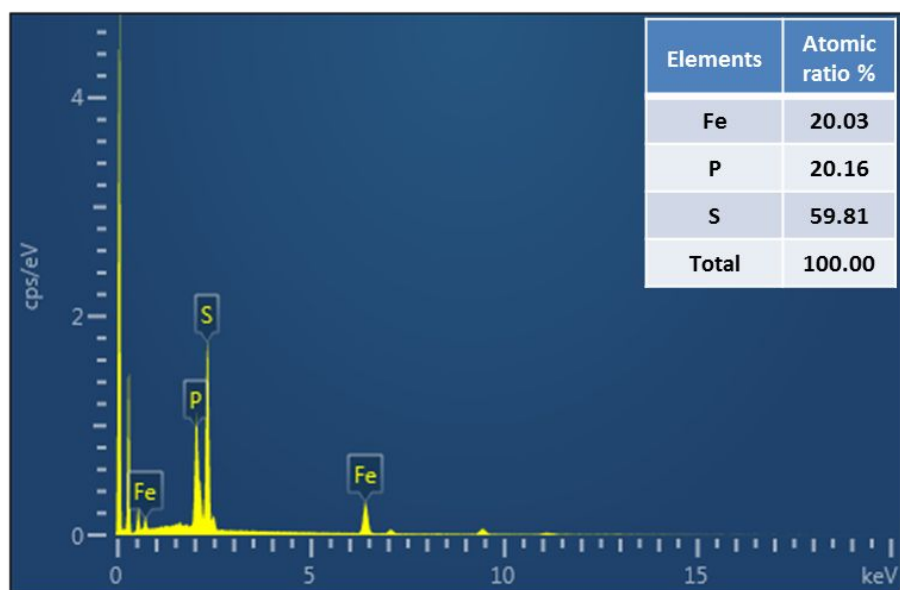

**Figure S1.** Energy dispersive X-ray spectrum of bulk  $\text{Fe}_2\text{P}_2\text{S}_6$ .

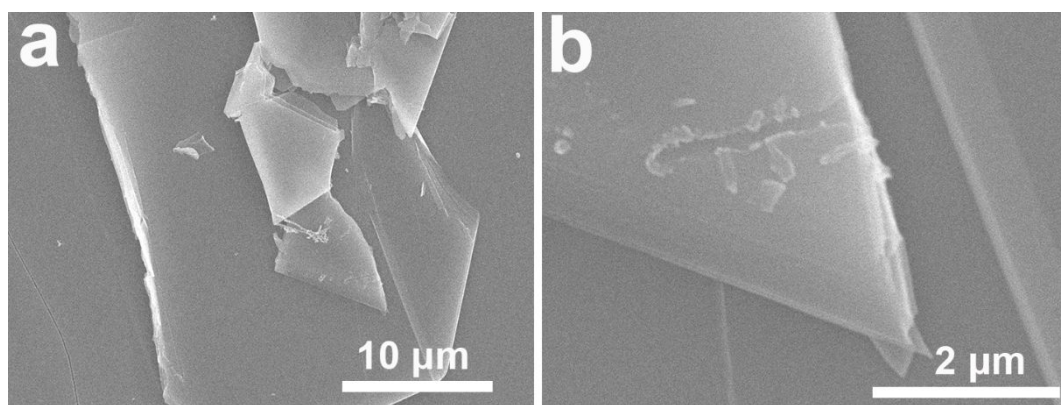

**Figure S2.** (a, b) SEM images of bulk Fe<sub>2</sub>P<sub>2</sub>S<sub>6</sub>.

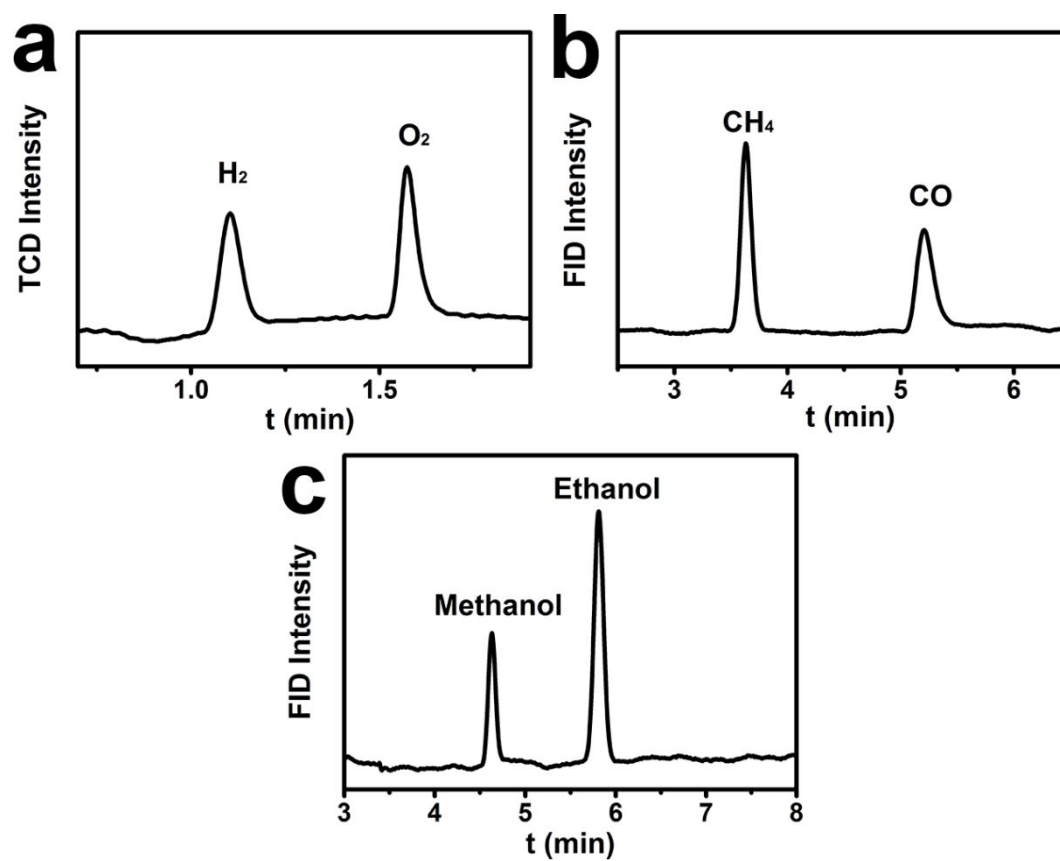

**Figure S3.** Typical chromatograms of  $\text{H}_2$ ,  $\text{CH}_4$ ,  $\text{CO}$ , methanol and ethanol measured by GC and HS-GC with FID.

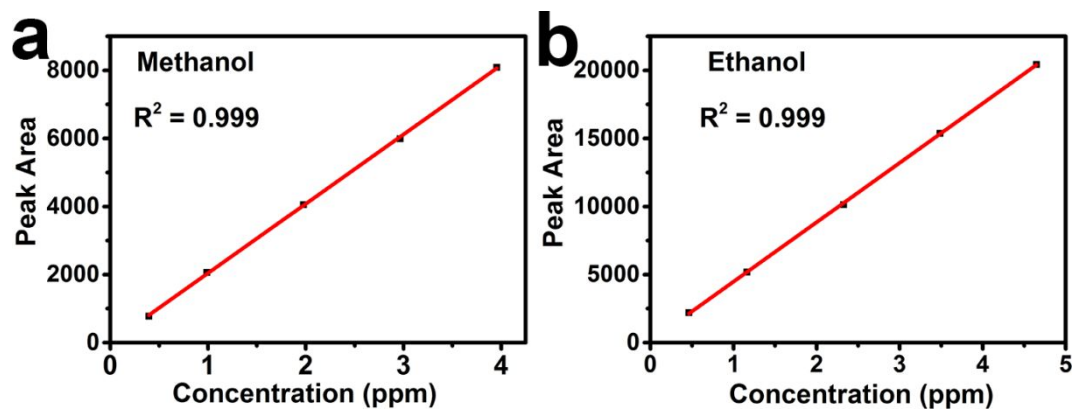

**Figure S4.** Standard calibration curves for (a) methanol and (b) ethanol.



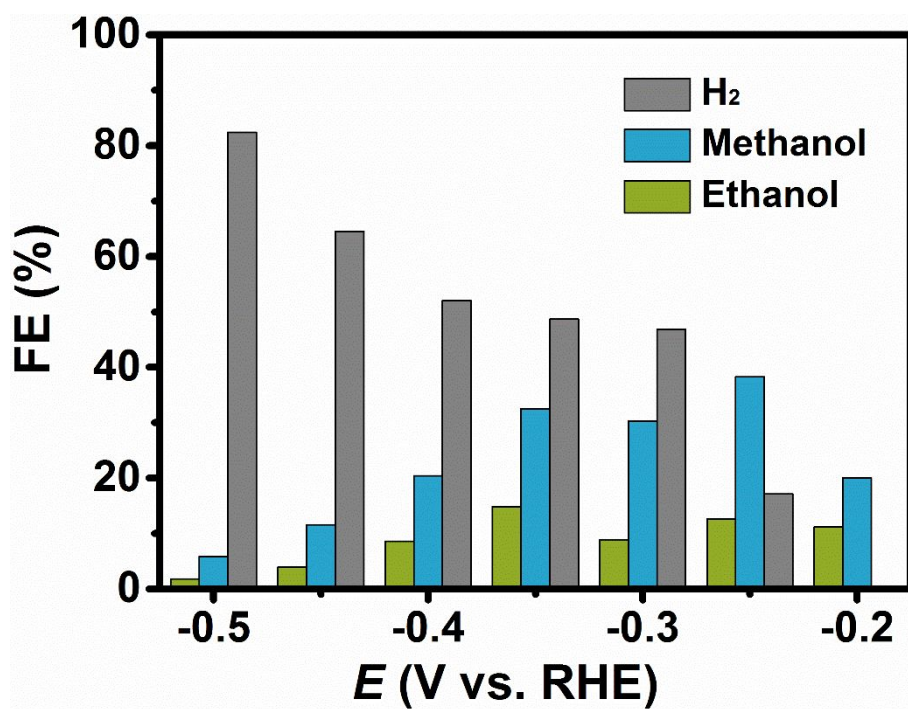

**Figure S5.** FEs of CO<sub>2</sub>RR products on bulk Fe<sub>2</sub>P<sub>2</sub>S<sub>6</sub>/CP at different potentials.

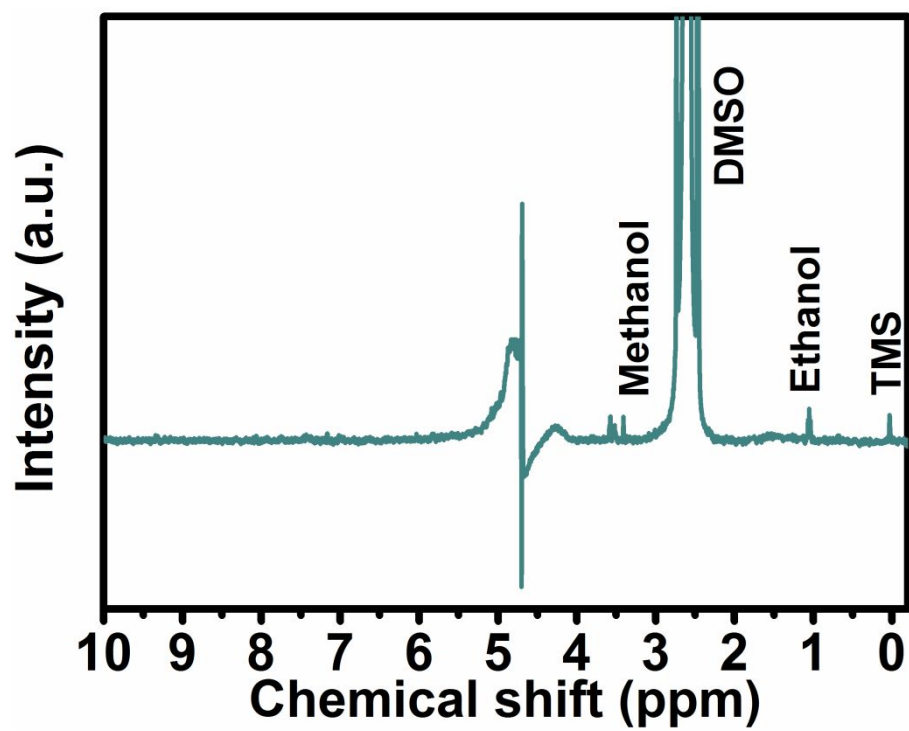

**Figure S6.**  $^1\text{H}$  NMR spectrum of electrolyte after  $\text{CO}_2\text{RR}$ .

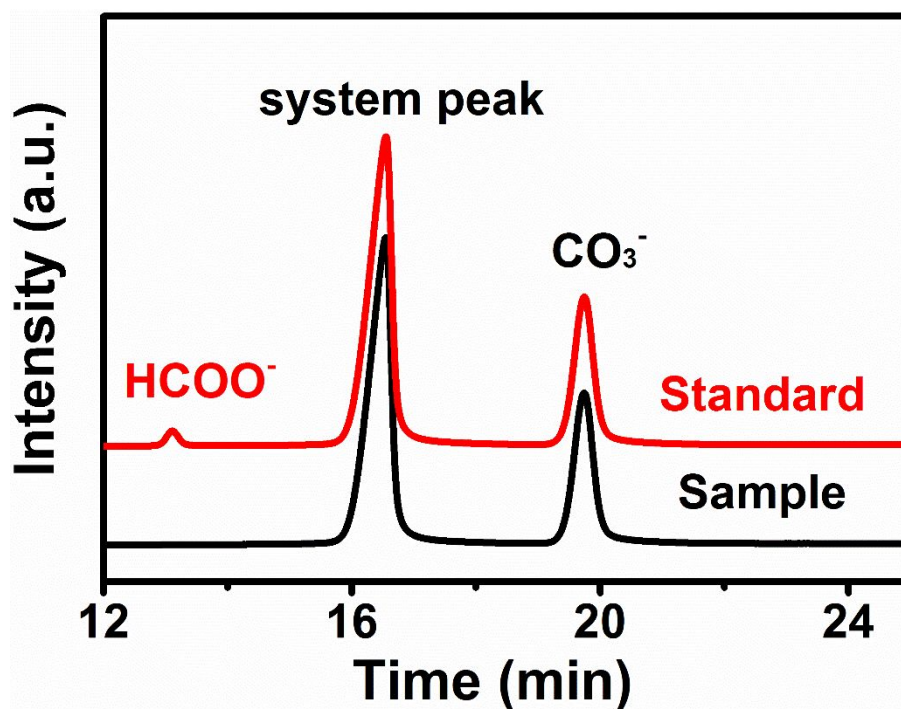

**Figure S7.** Ion chromatograms of standard sample (2.936 ppm HCOO<sup>-</sup> in 0.5 M KHCO<sub>3</sub> solution) and the electrolyte after 2-h electrolysis.

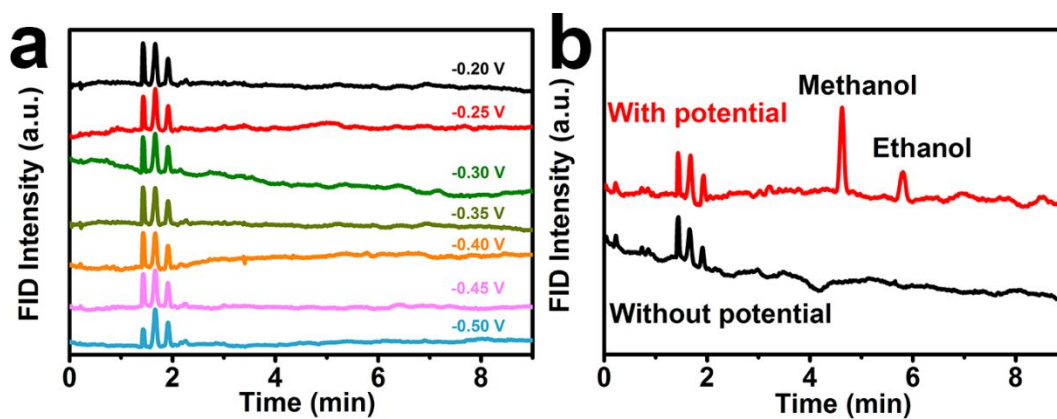

**Figure S8.** (a) Chromatograms for Ar-saturated 0.5 M  $\text{KHCO}_3$  at different potentials using HS-GC. (b) Chromatograms for  $\text{CO}_2$ -saturated 0.5 M  $\text{KHCO}_3$  with and without potential applied to the electrochemical cell.

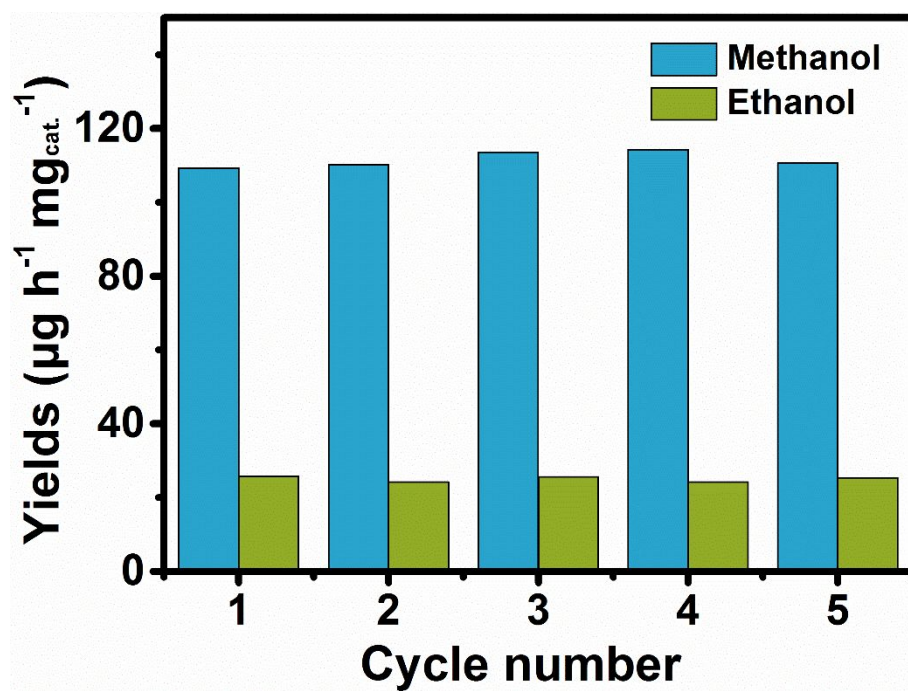

**Figure S9.** Alcohol yields on  $\text{Fe}_2\text{P}_2\text{S}_6$  nanosheet/CP at applied potential  $-0.50$  V for 5 times cycle measurements

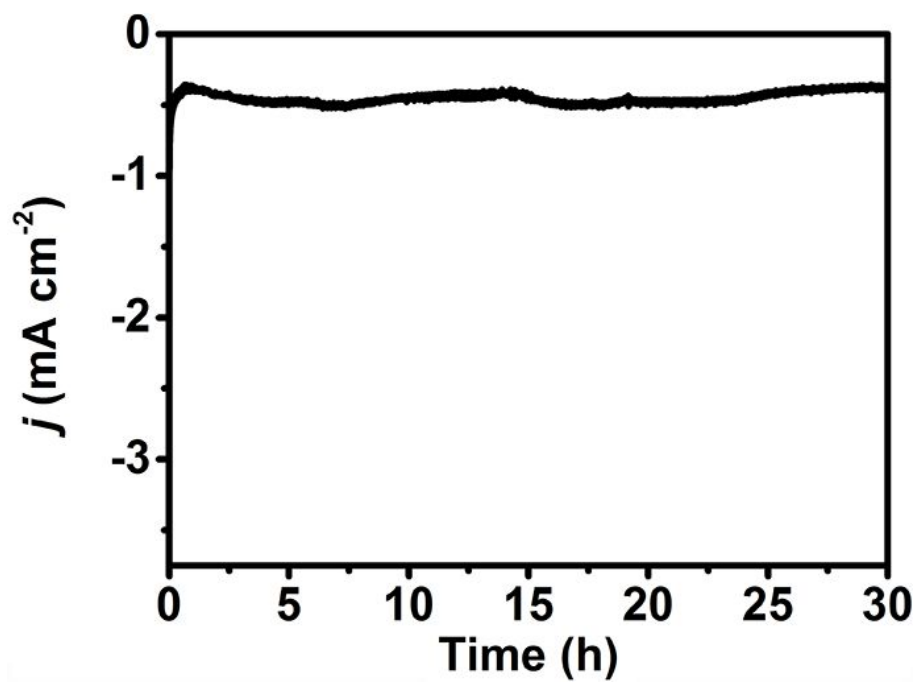

**Figure S10.** Chronopotentiometry curve under  $-0.50$  V for 30 h in  $0.5$  M  $\text{KHCO}_3$ .

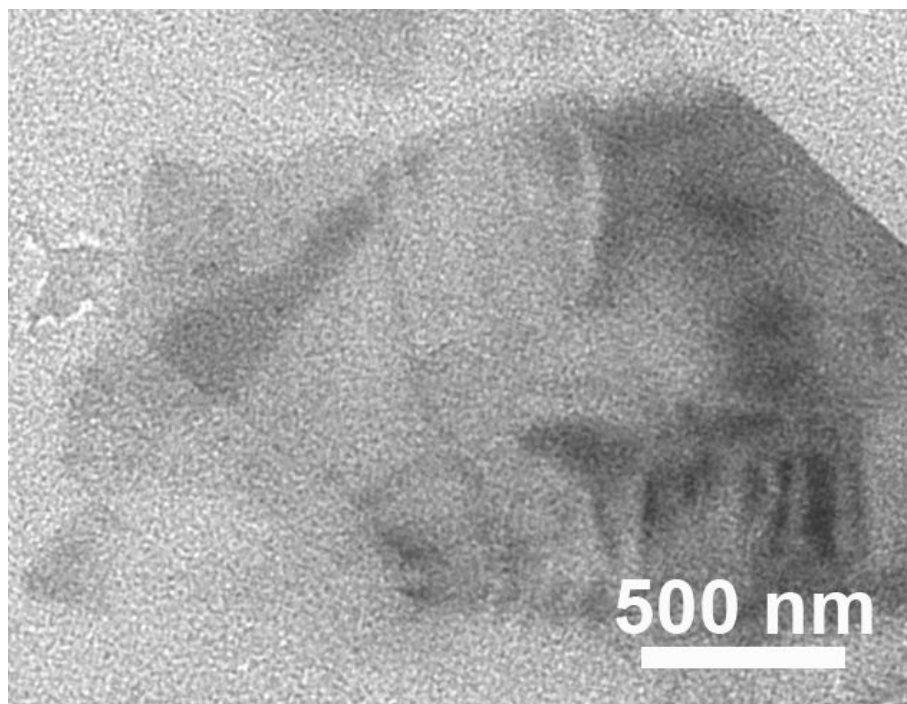

**Figure S11.** TEM image for Fe<sub>2</sub>P<sub>2</sub>S<sub>6</sub> nanosheet after long-term CO<sub>2</sub>RR electrolysis.

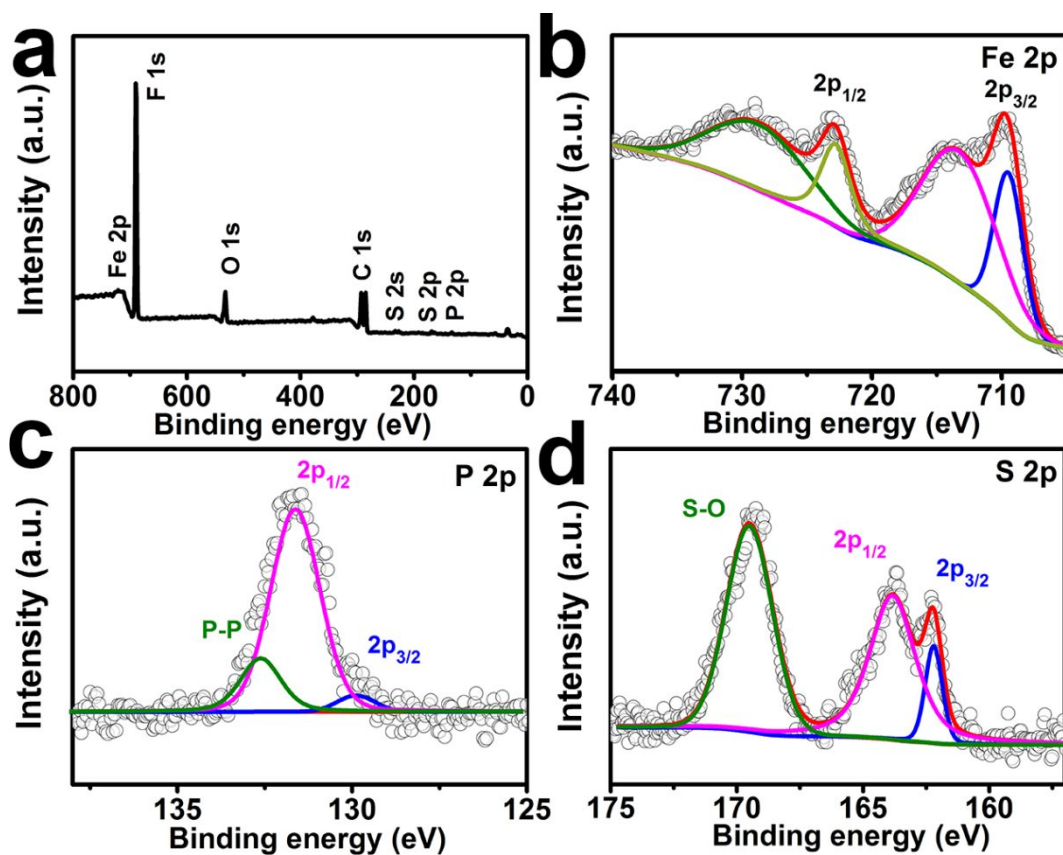

**Figure S12.** (a) XPS survey spectrum of Fe<sub>2</sub>P<sub>2</sub>S<sub>6</sub> nanosheet after long-term CO<sub>2</sub>RR electrolysis. XPS spectra in (b) Fe 2p, (c) P 2p, and (d) S 2p regions for Fe<sub>2</sub>P<sub>2</sub>S<sub>6</sub> nanosheet. C 1s signals arise from carbon paper and Nafion. F element and S-O bond were attributed to Nafion.



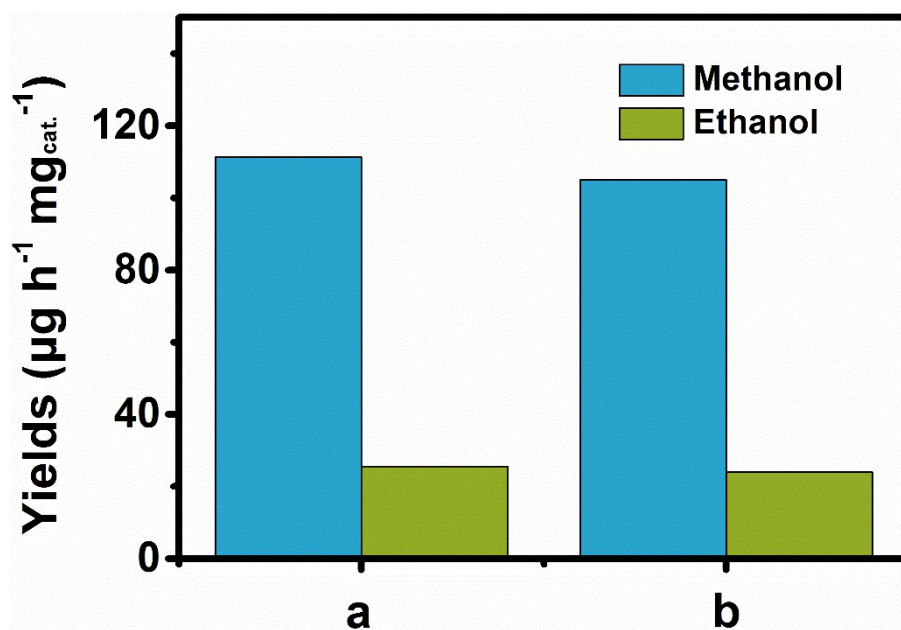

**Figure S13.** Yields of methanol and ethanol on Fe<sub>2</sub>P<sub>2</sub>S<sub>6</sub> nanosheet/CP before (a) and after (b) long-term electrolysis at  $-0.50$  V for 2 h in 0.5 M KHCO<sub>3</sub>.

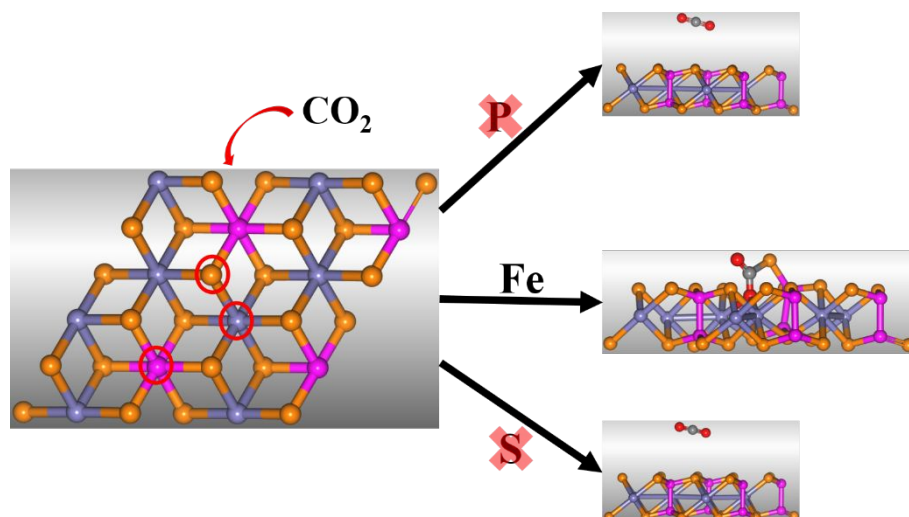

**Figure S14.** Tests on the active sites: P (pink), Fe (bluish violet), S (orange), O (red), and C (gray) atoms.

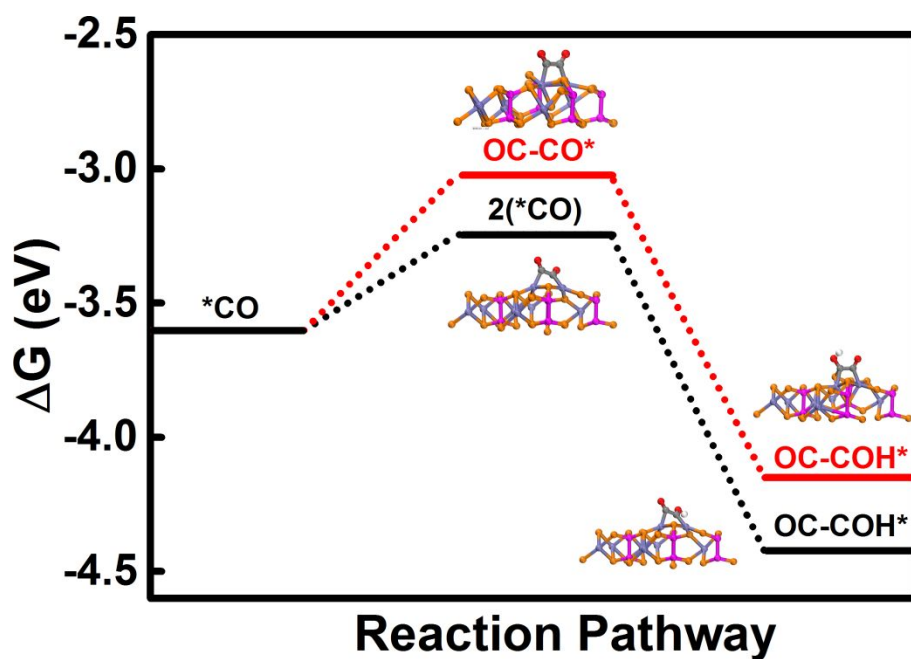

**Figure S15.** Reaction energy profile from DFT calculations for coupling path of CO + CO over  $\text{Fe}_2\text{P}_2\text{S}_6$  surface. The nearby  $\ast\text{CO}$  is coupled to form  $2(\ast\text{CO})$  intermediate with  $\Delta G$  of 0.35 eV. And the  $\ast\text{CO}$  couples with the nearby  $\text{CO}(\text{g})$  to form the intermediate  $\text{OC-CO}^\ast$  with  $\Delta G$  of 0.57 eV. This implies that the intermediate  $\ast\text{CO}$  is also available to combine another nearby  $\text{CO}(\text{g})$  to produce the intermediate  $\text{OC-CO}^\ast$  and further hydrogenation into  $\text{C}_2\text{H}_5\text{OH}$ .

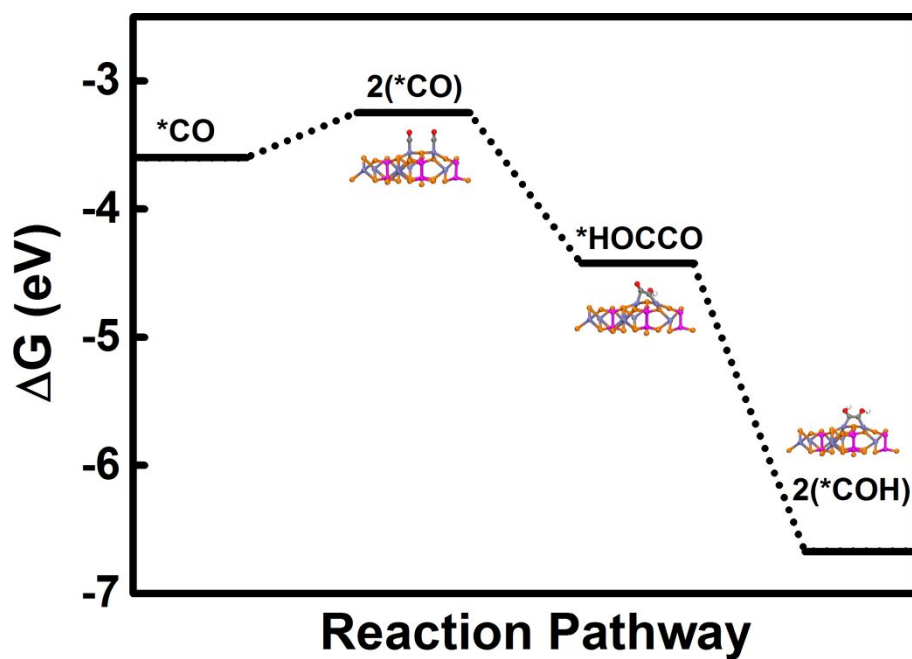

**Figure S16.** Reaction energy profile from DFT calculations for  $2(*\text{CO}) \rightarrow 2(*\text{COH})$  stage over  $\text{Fe}_2\text{P}_2\text{S}_6$  surface. The detailed  $2(*\text{CO}) \rightarrow 2(*\text{COH})$  stage is considered in this work, where the H atom occurs to react subsequently.

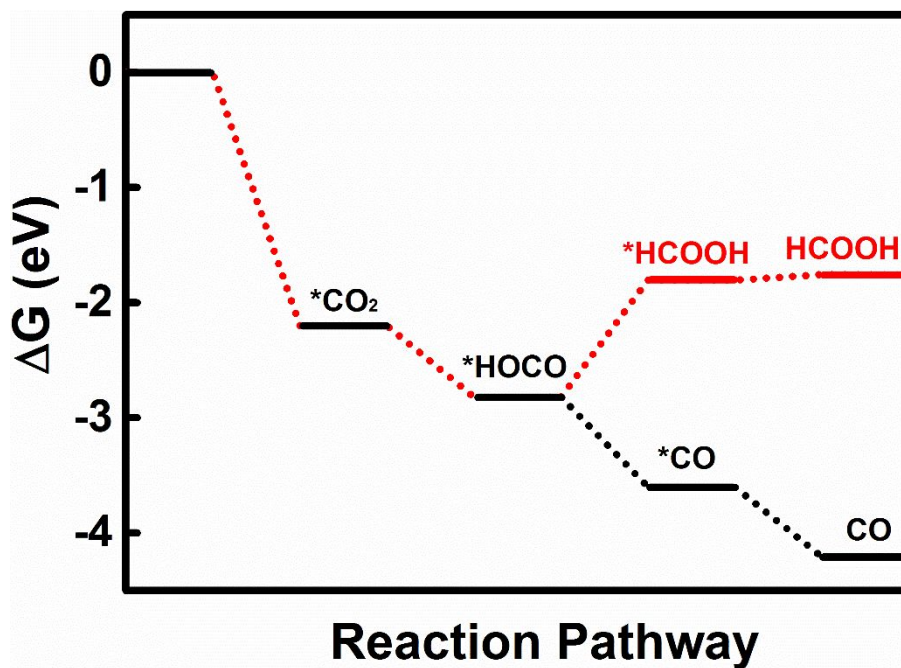

**Figure S17.** Reaction energy profile from DFT calculations for  $*CO_2 \rightarrow *HCOO \rightarrow *HCOOH \rightarrow HCOOH$  stage over  $Fe_2P_2S_6$  surface. The hydrogenation process of  $*HOCO \rightarrow *HCOOH$  is an uphill pathway with  $\Delta G = 0.97$  eV, implying that  $*CO$  is preferentially generated in this reaction pathway rather than  $*HCOOH$ .

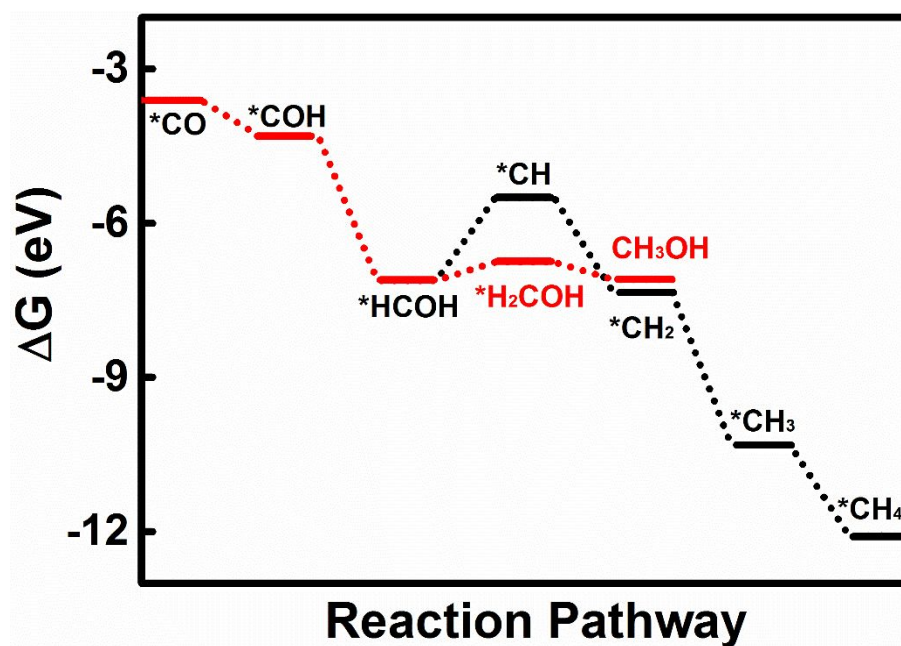

**Figure S18.** Reaction energy profile from DFT calculations for reaction pathway of CH<sub>4</sub> over Fe<sub>2</sub>P<sub>2</sub>S<sub>6</sub> surface. Processes of \*HCOH → \*CH and \*HCOH → \*H<sub>2</sub>COH are uphill pathway with  $\Delta G = 1.60$  eV and 0.36 eV, respectively. Thus, compared with \*CH, the \*HCOH preferentially converts to \*H<sub>2</sub>COH, which further hydrogenation into CH<sub>3</sub>OH.

**Table S1.** Comparison of CO<sub>2</sub>RR performance in aqueous media for Fe<sub>2</sub>P<sub>2</sub>S<sub>6</sub> nanosheet with other alcohol-producing electrocatalysts.

| Catalyst                                                    | Electrolyte                        | Potential (V)      | FE (%)   |         | Ref.      |
|-------------------------------------------------------------|------------------------------------|--------------------|----------|---------|-----------|
|                                                             |                                    |                    | methanol | ethanol |           |
| Fe <sub>2</sub> P <sub>2</sub> S <sub>6</sub> nanosheet     | 0.5 M KHCO <sub>3</sub>            | −0.20 vs. RHE      | 65.2     | 23.1    | This work |
| Pd/SnO <sub>2</sub>                                         | 0.1 M NaHCO <sub>3</sub>           | −0.24 vs. RHE      | 54.8±2   | -       | (6)       |
| Cu <sub>2</sub> O/ZnO-based electrodes                      | 0.5 M KHCO <sub>3</sub>            | −1.3 V vs. Ag/AgCl | 17.7     | -       | (7)       |
| RuO <sub>2</sub> -TiO <sub>2</sub> nanoparticle             | 0.5 M NaHCO <sub>3</sub>           | −0.8 V vs. SCE     | 60.5     | -       | (8)       |
| Cu <sub>2</sub> O-MWCNTs                                    | 0.5 M NaHCO <sub>3</sub>           | −0.8 V vs. Ag/AgCl | 38       | -       | (9)       |
| Ru/Cu                                                       | 0.5 M NaHCO <sub>3</sub>           | −0.8 V vs. SCE     | 41.3     | -       | (10)      |
| Cu(I) oxide                                                 | 0.5 M NaHCO <sub>3</sub>           | −1.1 V vs. SCE     | 38       | -       | (11)      |
| Cu-Au alloy                                                 | 0.5 M NaHCO <sub>3</sub>           | −1.1 V vs. SCE     | 15.9     | 12.0    | (12)      |
| Cu Nanowire Arrays                                          | 0.1 M KHCO <sub>3</sub>            | −1.1 V vs. SCE     | -        | 5.0     | (13)      |
| Cu <sub>2</sub> O films                                     | 0.1 M KHCO <sub>3</sub>            | −0.99 V vs. RHE    | -        | 17.22   | (14)      |
| Cu <sub>4</sub> Zn                                          | 0.1 M NaHCO <sub>3</sub>           | −1.05 V vs. RHE    | -        | 29.1    | (15)      |
| Co/SL-NG                                                    | 0.1 M NaHCO <sub>3</sub>           | −0.90 V vs. SCE    | 71.4     | -       | (16)      |
| Co(CO <sub>3</sub> ) <sub>0.5</sub> OH·0.11H <sub>2</sub> O | 0.1 M NaHCO <sub>3</sub>           | −0.98 V vs. SCE    | 97.0     | -       | (17)      |
| Cu <sub>88</sub> Sn <sub>6</sub> Pb <sub>6</sub> alloy      | 1.5 M HCl-0.17 M BaCl <sub>2</sub> | −0.6 V vs. Ag/AgCl | 36.3     | -       | (18)      |
| [PYD]@Pd                                                    | 0.5 M KCl                          | −0.6 V vs. SCE     | 35       | -       | (19)      |
| [PYD]@Cu-Pt                                                 | 0.5 M KCl                          | −0.6 V vs. SCE     | 37       | -       | (20)      |
| [PYD]@Cu-Pd                                                 | 0.5 M KCl                          | −0.6 V vs. RHE     | -        | 12±1    | (21)      |

**Table S2.** All of the species during the reaction pathways. Fe, bluish violet; P, pink; S, orange; O, red; C, gray; H, white.

| Species                           | Geometry                                                                            | Species                         | Geometry                                                                             |
|-----------------------------------|-------------------------------------------------------------------------------------|---------------------------------|--------------------------------------------------------------------------------------|
| *CO <sub>2</sub>                  | 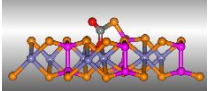   | *OCH <sub>3</sub>               |    |
| *HOCO                             |    | CH <sub>3</sub> OH <sup>1</sup> |    |
| *HCOOH                            |    | *COH                            |    |
| *CO                               |    | *HCOH                           |    |
| *2(CO)                            |    | *H <sub>2</sub> COH             |    |
| *2(COH)                           |  | CH <sub>3</sub> OH <sup>2</sup> |  |
| *C <sub>2</sub> H <sub>2</sub> OH |  | *CH                             |  |
| C <sub>2</sub> H <sub>5</sub> OH  |  | *CH <sub>2</sub>                |  |
| *HCO                              |  | *CH <sub>3</sub>                |  |
| *OCH <sub>2</sub>                 |  | *CH <sub>4</sub>                |  |



## Reference

- (1) Giannozzi, P.; Baroni, S.; Bonini, N.; Calandra, M.; Car, R.; Cavazzoni, C.; Ceresoli, D.; Chiarotti, G. L.; Cococcioni, M.; Dabo, I.; Corso, A. D.; de Gironcoli, S.; Fabris, S.; Fratesi, G.; Gebauer, R.; Gerstmann, U.; Gougoussis, C.; Kokalj, A.; Lazzeri, M.; Martin-Samos, L.; Marzari, N.; Mauri, F.; Mazzarello, R.; Paolini, S.; Pasquarello, A.; Paulatto, L.; Sbraccia, C.; Scandolo, S.; Sclauzero, G.; Seitsonen, A. P.; Smogunov, A.; Umari, P.; Wentzcovitch, R. M. QUANTUM ESPRESSO: A Modular and Open-Source Software Project for Quantum Simulations of Materials. *J. Phys. Condens. Matter* **2009**, *21*, 395502.
- (2) Perdew, J. P.; Burke, K.; Ernzerhof, M. Generalized Gradient Approximation Made Simple. *Phys. Rev. Lett.* **1996**, *77*, 3865–3868.
- (3) Methfessel, M.; Paxton, A. T. High-Precision Sampling for Brillouin-Zone Integration in Metals. *Phys. Rev. B* **1989**, *40*, 3616–3621.
- (4) Nørskov, J. K.; Rossmeisl, J.; Logadottir, A.; Lindqvist, L. Origin of the Overpotential for Oxygen Reduction at a Fuel-Cell Cathode. *J. Phys. Chem. B* **2004**, *108*, 17886–17992.
- (5) Peterson, A. A.; Abild-Pedersen, F.; Studt, F.; Rossmeisl, J.; Nørskov, J. K. How Copper Catalyzes the Electroreduction of Carbon Dioxide into Hydrocarbon Fuels. *Energy Environ. Sci.* **2010**, *3*, 1311–1315.
- (6) Zhang, W.; Qin, Q.; Dai, L.; Qin, R.; Zhao, X.; Chen, X.; Ou, D.; Chen, J.; Chuong, T.; Wu, B.; Zheng, N. Electrochemical Reduction of Carbon Dioxide to Methanol on Hierarchical Pd/SnO<sub>2</sub> Nanosheets with Abundant Pd–O–Sn Interfaces. *Angew. Chem. Int. Ed.* **2018**, *57*, 9475–9479.
- (7) Albo, J.; Sáez, A.; Solla-Gullón, J.; Montie, V.; Irabien, A. Production of Methanol from CO<sub>2</sub> Electroreduction at Cu<sub>2</sub>O and Cu<sub>2</sub>O/ZnO-Based Electrodes in Aqueous Solution. *Appl. Catal. B: Environ.* **2015**, *176–177*, 709–717.
- (8) Qu, J.; Zhang, X.; Wang, Y.; Xie, C. Electrochemical Reduction of CO<sub>2</sub> on RuO<sub>2</sub>/TiO<sub>2</sub> Nanotubes Composite Modified Pt Electrode. *Electrochim. Acta* **2005**, *50*, 3576–3580.

- (9) Malik, M. I.; Malaibari, Z. O.; Atieh, M.; Abussaud, B. Electrochemical Reduction of CO<sub>2</sub> to Methanol over MWCNTs Impregnated with Cu<sub>2</sub>O. *Chem. Eng. Sci.* **2016**, *152*, 468–477.
- (10) Popić, J. P.; Avramov-Ivić, M. L.; Vuković, N. B. Reduction of Carbon Dioxide on Ruthenium Oxide and Modified Ruthenium Oxide Electrodes in 0.5 M NaHCO<sub>3</sub>. *J. Electrochem. Soc.* **1997**, *421*, 105–110.
- (11) Le, M.; Ren, M.; Zhang, Z.; Sprunger, P. T.; Kurtz, R. L.; Flake, J. C. Electrochemical Reduction of CO<sub>2</sub> to CH<sub>3</sub>OH at Copper Oxide Surfaces. *J. Electrochem. Soc.* **2011**, *158*, E45–E49.
- (12) Jia, F.; Yu, X.; Zhang, L. Enhanced Selectivity for the Electrochemical Reduction of CO<sub>2</sub> to Alcohols in Aqueous Solution with Nanostructured Cu-Au Alloy as Catalyst. *J. Power Sources* **2014**, *252*, 85–89.
- (13) Ma, M.; Djanashvili, K.; Smith, W. A. Controllable Hydrocarbon Formation from the Electrochemical Reduction of CO<sub>2</sub> over Cu Nanowire Arrays. *Angew. Chem. Int. Ed.* **2016**, *55*, 6680–6684.
- (14) Ren, D.; Deng, Y.; Handoko, A. D.; Chen, C. S.; Malkhandi, S.; Yeo, B. S. Selective Electrochemical Reduction of Carbon Dioxide to Ethylene and Ethanol on Copper(I) Oxide Catalysts. *ACS Catal.* **2015**, *5*, 2814–2821.
- (15) Ren, D.; Ang, B. S.-H.; Yeo, B. S. Tuning the Selectivity of Carbon Dioxide Electroreduction toward Ethanol on Oxide-Derived Cu<sub>x</sub>Zn Catalysts. *ACS Catal.* **2016**, *6*, 8239–8247.
- (16) Huang, J.; Guo, X.; Yue, G.; Hu, Q.; Wang, L. Boosting CH<sub>3</sub>OH Production in Electrocatalytic CO<sub>2</sub> Reduction over Partially Oxidized 5 nm Cobalt Nanoparticles Dispersed on Single-Layer Nitrogen-Doped Graphene. *ACS Appl. Mater. Interfaces* **2018**, *10*, 44403–44414.
- (17) Huang, J.; Hu, Q.; Guo, X.; Zeng, Q.; Wang, L. Rethinking Co(CO<sub>3</sub>)<sub>0.5</sub>(OH)·0.11H<sub>2</sub>O: A New Property for Highly Selective Electrochemical Reduction of Carbon Dioxide to Methanol in Aqueous Solution. *Green Chem.* **2018**, *20*, 2967–2972.

- (18) Schizodimou, A.; Kyriacou, G. Acceleration of the Reduction of Carbon Dioxide in the Presence of Multivalent Cations. *Electrochim. Acta* **2012**, *78*, 171–176.
- (19) Yang, H.; Qin, S.; Wang, H.; Lu, J. Organically Doped Palladium: A Highly Efficient Catalyst for Electroreduction of CO<sub>2</sub> to Methanol. *Green Chem.* **2015**, *17*, 5144–5148.
- (20) Yang, H.; Yue, Y.; Qin, S.; Wang, H.; Lu, J. Selective Electrochemical Reduction of CO<sub>2</sub> to Different Alcohol Products by an Organically Doped Alloy Catalyst. *Green Chem.* **2016**, *18*, 3216–3220.
- (21) Yang, H.; Qin, S.; Yue, Y.; Liu, L.; Wang, H.; Lu, J. Entrapment of a Pyridine Derivative within a Copper–Palladium Alloy: A Bifunctional Catalyst for Electrochemical Reduction of CO<sub>2</sub> to Alcohols with Excellent Selectivity and Reusability. *Catal. Sci. Technol.* **2016**, *6*, 6490–6494.
